# Supplementary material for: Causal impact of physical activity on child health and development
Source: Research Square preprint supplement (doi:10.21203/rs.3.rs-1528069/v1), 2022-04-19
Supplement: Supplementary file 1 [file 7822daa836791e9a6fa8323e.pdf]

## **Data availability statement**

This paper uses unit record data from the Longitudinal Study of Australian Children (LSAC) and historical weather data from Australian Bureau of Meteorology (BOM). These data are proprietary and researchers wishing to use them must seek approval from the relevant institutions. In particular, LSAC data can be applied by completing an online form, following instructions from the LSAC data custodian - The Australian Institute of Family Studies - in this link <https://growingupinaustralia.gov.au/data-and-documentation/accessing-lsac-data>. We use a current (i.e., Release 9C1 of LSAC) and Restricted Release of LSAC which has postcode information and others linked administrative datasets. Historical weather data for all weather stations in Australia can be purchased from BOM by completing an online data request form at: <http://www.bom.gov.au/climate/data-services/data-requests.shtml>.

The authors are willing to offer guidance about the process of seeking approval and supply their STATA and QGIS codes to process the above datasets and to obtain the results presented in the manuscript.
